## CORRECTION

# Correction: Cigarette smoking and associated factors among men in five South Asian countries: A pooled analysis of nationally representative surveys

Md Shariful Islam, Mamunur Rashid, Monaemul Islam Sizear, Raafat Hassan, Mahbubur Rahman, Sarker Masud Parvez, Shuvon Chandra Hore, Rehnuma Haque, Farjana Jahan, Supta Chowdhury, Tarique Mohammad Nurul Huda, K. M. Saif-Ur-Rahman, Arifuzzaman Khan

The affiliation for the sixth author is incorrect. Sarker Masud Parvez is not affiliated with #10 but with #9: Faculty of Medicine, The University of Queensland, Brisbane, Queensland, Australia.

## Reference

1. Shariful Islam M, Rashid M, Sizear MI, Hassan R, Rahman M, Parvez SM, et al. (2022) Cigarette smoking and associated factors among men in five South Asian countries: A pooled analysis of nationally representative surveys. PLoS ONE 17(11): e0277758. <https://doi.org/10.1371/journal.pone.0277758> PMID: 36374917

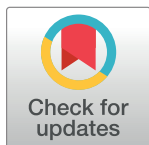

## OPEN ACCESS

**Citation:** Islam MS, Rashid M, Sizear MI, Hassan R, Rahman M, Parvez SM, et al. (2024) Correction: Cigarette smoking and associated factors among men in five South Asian countries: A pooled analysis of nationally representative surveys. PLoS ONE 19(12): e0315447. <https://doi.org/10.1371/journal.pone.0315447>

**Published:** December 5, 2024

**Copyright:** © 2024 Islam et al. This is an open access article distributed under the terms of the [Creative Commons Attribution License](https://creativecommons.org/licenses/by/4.0/), which permits unrestricted use, distribution, and reproduction in any medium, provided the original author and source are credited.
